1 **Critical Role for the Unique N-Terminus of Chlamydial MreB in Directing**

2 **Its Membrane Association and Interaction with Elements of the Divisome**

3 **Junghoon Lee<sup>1</sup>, John V. Cox<sup>2</sup>, and Scot P. Ouellette<sup>1</sup>**

4

5 <sup>1</sup> Department of Pathology and Microbiology, University of Nebraska Medical Center,

6 Omaha, NE, USA 68198

7 <sup>2</sup> Department of Microbiology, Immunology, and Biochemistry, University of Tennessee

8 Health Science Center, Memphis, TN, USA 38163

## 9 **Abstract**

10 *Chlamydiae* lack the conserved central coordinator protein of cell division FtsZ, a  
11 tubulin-like homolog. Current evidence indicates *Chlamydia* uses the actin-like homolog,  
12 MreB, to substitute for the role of FtsZ. Interestingly, we observed MreB as a ring at the  
13 septum in dividing cells of *Chlamydia*. We hypothesize that MreB, to substitute for FtsZ in  
14 *Chlamydia*, must possess unique properties compared to canonical MreB orthologs.  
15 Sequence differences between chlamydial MreB and orthologs in other bacteria revealed that  
16 chlamydial MreB possesses an extended N-terminal region and the conserved amphipathic  
17 helix found in other bacterial MreBs. The extended N-terminal region was sufficient to  
18 restore the localization of a truncated *E. coli* MreB mutant lacking its amphipathic helix to  
19 the membrane and was crucial for interactions with cell division components RodZ and FtsK,  
20 though the region was not required for homotypic interactions. Importantly, the N-terminal  
21 region was sufficient to direct GFP to the membrane when expressed in *Chlamydia*. A mutant  
22 N-terminal region with reduced amphipathicity was unable to perform these functions. From  
23 these data, the extended N-terminal region of chlamydial MreB is critical for localization and  
24 interactions of this protein. Our data provide mechanistic support for chlamydial MreB to  
25 serve as a substitute for FtsZ.

26 **Word Count: 200/200**

27

28

29

30

31

## 32 **Importance**

33 *Chlamydia trachomatis* is an obligate intracellular pathogen, causing sexual  
34 transmitted diseases and trachoma. Studying chlamydial physiology, especially its cell  
35 division mechanism, is important for developing novel therapeutic strategies for the  
36 treatment of these diseases. Since chlamydial cell division has unique features, including a  
37 polarized cell division process independent of FtsZ, a canonical cell division coordinator,  
38 studying the subject is helpful for understanding undefined aspects of chlamydial growth. In  
39 this study, we characterized MreB, a substitute for FtsZ, as a cell division coordinator. It  
40 forms a filamentous ring at the septum, like FtsZ in *E. coli*. We show that the localization of  
41 MreB is dependent upon the amphipathic nature of its extended N-terminus. Furthermore,  
42 this region is crucial for its interaction with other proteins involved in cell division. Given  
43 these results, chlamydial MreB may function as a scaffold for cell divisome proteins at the  
44 septum and regulate cell division in this organism.

45 **Word count: 150/150**

## 46 **Introduction**

47 Bacteria within the genus *Chlamydia* are obligate intracellular pathogens that cause  
48 diverse diseases in humans and animals. These Gram-negative cocci differentiate between  
49 two morphologically and functionally distinct cellular forms during their developmental  
50 cycle: the elementary body (EB) and the reticulate body (RB)(1). The EB is the infectious but  
51 non-dividing form whereas the RB is the dividing but non-infectious form. After entering the  
52 host cell, *Chlamydia* remains within a membrane-bound parasitic organelle, termed an  
53 inclusion(2). RBs undergo multiple rounds of cell division until they engage a secondary  
54 differentiation program and convert to EBs, which are subsequently released from the host  
55 cell to propagate the infection.

56 In evolving to obligate intracellular dependence, *Chlamydia* has significantly  
57 reduced its genome, eliminating *ftsZ*(3), the conserved tubulin-like cell division coordinator  
58 of binary fission(4). However, *Chlamydia* encodes rod-shape determining proteins associated  
59 with peptidoglycan synthesis in the lateral cell wall of bacilli. That *Chlamydia* has retained  
60 these genes is unusual since these are coccoid bacteria and only synthesize peptidoglycan  
61 during division(5). The absence of FtsZ in chlamydiae suggests they may not divide by  
62 binary fission. Recent work from our labs supports this. We employed both live- and fixed-  
63 cell imaging to localize various markers, including a division protein (FtsQ(6)), during EB-  
64 to-RB differentiation and the first division of the RB. Interestingly, we observed that  
65 chlamydiae are highly polarized throughout this time and that division itself occurs via a  
66 polarized process(7). This polarized budding process remains the primary mode of division  
67 even at later times during the developmental cycle (Cox et al., *in prep*).

68 In 2012, we hypothesized and presented evidence that *Chlamydia* co-opted the rod-  
69 shape determining protein MreB to function as the central coordinator of division(8). To



70 perform this function, we hypothesize that chlamydial MreB possesses unique properties.  
71 Many MreB homologs encode an N-terminal amphipathic helix that facilitates MreB  
72 association with the inner membrane(9). At the membrane it engages peptidoglycan  
73 machinery while forming short moving filaments(10-12). Here, we investigated the unique  
74 structural features of chlamydial MreB that allow it to substitute for FtsZ. Chlamydial MreB  
75 forms rings at the division site, and bioinformatics analysis indicates that chlamydial MreB  
76 encodes an extended N-terminal region (amino acids 1-23: aa1-23) in addition to the  
77 conserved amphipathic helix. The aa1-23 residues also encode predicted amphipathicity. We  
78 confirmed that the conserved amphipathic helix, but not aa1-23, is important for directing  
79 membrane-localization of GFP in *E. coli*. Nevertheless, aa1-23 were sufficient to direct GFP  
80 to the membrane in *Chlamydia*, and this localization was abolished when mutations were  
81 introduced in aa1-23 to reduce its amphipathicity. We determined the N-terminal region of  
82 chlamydial MreB is crucial for its interactions with cell division proteins but not its ability to  
83 form homo-oligomers. Our data indicate the N-terminal region of chlamydial MreB is  
84 important for membrane localization and interaction with the divisome. These properties  
85 allow it to function in a manner distinct from other MreB orthologs and regulate the cell  
86 division process in *Chlamydia*.

87 **Word Count: 483/500**

## 88 **Results**

89 **Chlamydial MreB\_6xH localizes as a ring at the division site.** Given our hypothesis for  
90 the role of chlamydial MreB in directing polarized division, we examined its localization  
91 during the first division of an RB. We were unable to detect endogenous MreB with the  
92 antibody previously used to image the distribution of MreB in *Chlamydia*(13). We then  
93 attempted to image wild-type and various truncation mutants of MreB using a GFP sandwich

94 (SW) fusion strategy that, in *E. coli*, was reported to be functional(14) (N- or C-terminal  
95 fluorescent protein fusions with MreB display an artifactual localization(15)). However,  
96 when we inducibly expressed MreB\_GFP<sub>SW</sub> in *C. trachomatis* L2, bacterial growth was  
97 significantly inhibited even with low levels of expression, as observed by the presence of a  
98 small number of enlarged bacteria (Suppl. Fig. 1). More importantly, the fusion protein did  
99 not localize to the membrane as reported (Suppl. Fig. 1; (13)). The reasons for this are not  
100 clear. We, therefore, opted to construct an MreB fusion with a small C-terminal hexahistidine  
101 tag (MreB\_6xH). The human epithelial cell line, HeLa, was infected with a transformant of *C.*  
102 *trachomatis* L2 carrying a plasmid to inducibly express MreB\_6xH. At 6 hours post-infection  
103 (hpi), expression of MreB\_6xH was induced with anhydrotetracycline (aTc), and cells were  
104 fixed at 10.5 hpi, a time when the nascent RB has begun its first division(7). As seen in  
105 Figure 1, we observed using super-resolution structured illumination microscopy (SIM) the  
106 polar localization of the major outer membrane protein (MOMP) in the budding daughter cell  
107 as previously reported(7). Consistent with its proposed role in division(8), MreB\_6xH was  
108 localized in a band-like structure across the septum and not in puncta as previously  
109 reported(13, 16). Interestingly, when 3D reconstructions were assembled from the SIM  
110 images, we observed that MreB\_6xH formed ring-like structures at the septum with areas of  
111 more intense signal (Fig. 1 arrowheads). These areas of more intense signal may correspond  
112 to the puncta previously observed (13, 16).

113 **Chlamydial MreB encodes an amphipathic helix and an extended N-terminal region**  
114 **conserved in *Chlamydia*.** In many Gram-negative bacteria, there is an amphipathic helix at  
115 the N-terminus of MreB, and the helix is important for the membrane localization of  
116 MreB(9). This localization is crucial for the role of MreB in directing PG synthesis during  
117 lateral cell wall growth(9, 17). To confirm whether chlamydial MreB also has these features,  
118 we predicted its secondary structure and amphipathic regions using bioinformatics tools (Fig.

119 2). The alignment data show that chlamydial MreB encodes an extended N-terminal region  
120 (amino acids 1-23: aa1-23), which other Gram-negative bacteria lack (Fig. 2A). Importantly,  
121 this extended N-terminal region is conserved amongst *Chlamydia* (Suppl. Fig. 2). Following  
122 this region, there is a predicted amphipathic helix, from R24 to F29 (Fig. 2B), that aligns  
123 with the amphipathic helices of the other bacteria (Fig. 2A). A high amphipathic score (A-  
124 score) extends to residue F32 in chlamydial MreB. Interestingly, aa1-23 also has a high A-  
125 score though the region was not predicted to form an amphipathic helix (Fig. 2B). Similar  
126 results were seen with the more divergent *Waddlia* MreB homolog (Suppl. Fig. 2B).  
127 Nevertheless, performing a helical wheel analysis with 8 amino acid windows revealed that  
128 each window shows amphipathicity (Fig. 2C). Based on these observations, we conclude that  
129 the extended N-terminal region of chlamydial MreB may possess membrane-associating  
130 properties.

131 **Chlamydial MreB is unable to complement an *mreB*-deficient mutant of *E. coli*.** The  
132 bioinformatics data suggested that chlamydial MreB encodes unique structural features  
133 absent in other bacterial MreBs (Fig. 2A). To assess the activities associated with these  
134 unique structural elements, we introduced chlamydial MreB into an *mreB*-deficient mutant of  
135 *E. coli*. As *mreB* is an essential gene in *E. coli*, Bendezu et al. made the strain P2733, which  
136 has a deletion in the *mreB* gene and is conditionally viable by the overexpression of the  
137 *ftsQAZ* operon(18). This strain has been used for complementation assays and grows as  
138 coccoid bacteria, since MreB is necessary for the maintenance of rod-shape(18). To test  
139 whether chlamydial MreB (CtrMreB) is capable of complementing the *mreB* deficient mutant,  
140 P2733 was transformed with an arabinose-inducible vector encoding chlamydial *mreB*. Cell  
141 shape was compared after inducing MreB expression in comparison to an empty vector  
142 negative control and an *E. coli* MreB (EcMreB) positive control (Suppl. Fig. 3A&B). When  
143 EcMreB is expressed from an arabinose-inducible promoter in the P2733 strain, the *E. coli*

144 cells begin to adopt a rod shape, consistent with other reports(14, 18, 19). When chlamydial  
145 MreB was induced, the morphology of P2733 was unchanged compared to uninduced or  
146 empty vector controls, indicating that chlamydial MreB does not complement the *mreB*-  
147 deficient mutant of *E. coli* (Suppl. Fig. 3C). To determine whether the inability of chlamydial  
148 MreB to complement was due to its extended N-terminal region, we performed the same  
149 experiment with  $\Delta$ N22 chlamydial MreB, which more closely resembles *E. coli* MreB in size  
150 and characteristics at the N-terminus. We observed that  $\Delta$ N22 chlamydial MreB also does not  
151 complement the *mreB* deficient *E. coli*, suggesting that the extended N-terminal region is not  
152 the only reason for the failure to complement (Suppl. Fig. 3D – see also Discussion).  
153 Chlamydial MreB expression was confirmed in these experiments by western blotting (Suppl.  
154 Fig. 3E).

155 **The amphipathic helix, but not the extended N-terminal region, of chlamydial MreB is**  
156 **sufficient to direct GFP to the membrane in *E. coli*.** We hypothesized that, because of their  
157 amphipathicity, the unique sequence elements at the N-terminus of chlamydial MreB could  
158 direct the membrane localization of MreB (Fig. 1). To test this, we performed a series of  
159 localization studies in *E. coli* using the N-terminal regions of chlamydial MreB (CtrMreB)  
160 fused to GFP. A similar strategy was used to demonstrate that two copies of the amphipathic  
161 helix of *E. coli* MreB (EcMreB) were sufficient to direct GFP to the membrane(9). We made  
162 various fusions in which either one or two copies of portions of the N-terminal region of  
163 chlamydial MreB were fused to GFP (illustrated in Fig. 3A). We then observed the  
164 localization of these proteins in both wild-type (MG1655) and MreB-deficient (P2733) *E.*  
165 *coli* (Fig. 3B and Suppl. Fig. 4). We observed that a single copy of aa1-32 (MreB<sub>1-32</sub>),  
166 encoding all high A-score residues, was sufficient to direct GFP to the membrane.  
167 Interestingly, aa1-28 (MreB<sub>1-28</sub>), encoding both the predicted amphipathic helix and the  
168 extended N-terminus, was also sufficient to direct GFP to the membrane, but, in wild-type

169 cells, its localization was primarily restricted to the poles (Fig. 3C). Consistent with what has  
170 been observed in *E. coli*, two copies of aa23-32 (MreB<sub>23-32</sub>), encoding the predicted  
171 amphipathic helix, directed GFP to the membrane. Contrary to our prediction, one or two  
172 copies of aa1-23 (MreB<sub>1-23</sub>) was not able to direct GFP to the membrane even though the  
173 region has a high A-score (Fig. 2B).

174 **The extended N-terminal region of chlamydial MreB is sufficient to direct GFP to the**  
175 **membrane in *C. trachomatis* L2.** We next asked the question whether aa1-23, alone or in  
176 combination with the predicted amphipathic region (aa24-28), could direct GFP to the  
177 membrane in *Chlamydia*. The MreB<sub>1-23aa</sub>\_GFP or MreB<sub>1-28aa</sub>\_GFP fusions were moved to an  
178 inducible chlamydial expression plasmid and transformed into *C. trachomatis* L2. These  
179 transformants were then used to infect HeLa cells, and construct expression was induced at  
180 either 6 or 16 hpi. Infected cells were fixed and imaged at 10.5 or 20 hpi, respectively (Fig.  
181 4). GFP alone is a cytosolic protein when expressed in chlamydiae (Fig. 4A). For both fusion  
182 proteins, GFP fluorescence was observed at membrane sites (Fig. 4B&C with arrowheads in  
183 4B indicating individual bacteria with membrane localization of GFP) at both time points  
184 examined.

185         Importantly, the aa1-23\_GFP and aa1-28\_GFP localization profiles were distinct  
186 from full-length MreB (Fig. 1, Suppl. Fig. 5), suggesting their localization profiles are not  
187 dependent on interactions with endogenous (i.e. chromosomally-encoded) MreB. To test this,  
188 we used the bacterial adenylate cyclase-based two hybrid (BACTH) assay, which is based on  
189 the reconstitution of enzyme activity by two interacting proteins that bring catalytic adenylate  
190 cyclase fragments (T25 and T18) into close proximity. We performed BACTH assays with  
191 full-length MreB and aa1-32 of MreB, and observed no interaction (data not shown). To  
192 further test a role for interactions with endogenous MreB, we expressed the GFP fusion

193 proteins or MreB\_6xH and then treated the cultures with A22, an MreB-specific antibiotic, to  
194 depolymerize MreB. Under these conditions, we observed the localization of the GFP fusion  
195 proteins at the membrane whereas the membrane-associated MreB\_6xH was significantly  
196 reduced (Suppl. Fig. 5). Based on these data, we conclude that the membrane localization of  
197 the GFP fusion proteins is caused by the amphipathic nature of the N-terminus and not its  
198 interaction with endogenous MreB.

199         The N-terminal region of MreB from *C. trachomatis* has two leucine residues (L13  
200 and L22) encoded by TTG. As bacteria can use UUG and GUG as alternative start codons  
201 (20), we performed a similar series of experiments using the N-terminal region of MreB from  
202 *C. suis*, which does not use UUG codons for its homologous leucine residues. In all cases  
203 tested, the N-terminal residues of *C. suis* MreB (fused to GFP) exhibited the same  
204 localization patterns as those observed for the *C. trachomatis* N-terminal MreB\_GFP fusions  
205 (Suppl. Fig. 6). Based on these data, we conclude that it is unlikely the MreB of *C.*  
206 *trachomatis* bypasses the predicted AUG start codon in favor of downstream alternative start  
207 codons.

208         To further examine whether the membrane localization of aa1-23\_GFP and aa1-  
209 28\_GFP were dependent on their amphipathicity, we created the mutations L7K, L22R, and  
210 F25K. These mutations were predicted to diminish the amphipathicity of this region (Fig.  
211 5A). The mutations within the N-terminal region were incorporated into the aa1-23\_GFP and  
212 aa1-28\_GFP fusion constructs, transformed into *C. trachomatis* L2, and inducibly expressed.  
213 As demonstrated in Figure 5 (B&C), we observed the cytosolic localization of the fusion  
214 peptides. Therefore, from the combination of these data, we conclude that the amphipathic  
215 properties of the extended N-terminal region of chlamydial MreB are sufficient to direct GFP  
216 to the membrane in *Chlamydia*.

217 **The extended N-terminal region is dispensable for MreB homo-oligomerization but**  
218 **essential for interactions with other division proteins.** We next asked whether the N-  
219 terminal region is necessary for MreB homo-oligomerization. In *E. coli*, MreB interacts with  
220 itself to form short filaments(10). In addition, since MreB participates in both cell shape  
221 determination and cell division, it interacts with diverse proteins related to cell division and  
222 peptidoglycan synthesis(14, 19, 21). These features are shared with chlamydial MreB, which  
223 interacts with itself and with several proteins such as the cytoskeletal protein RodZ and the  
224 cell division components FtsK and FtsQ(6, 8, 22). Based on these previous reports, we  
225 hypothesized that the extended N-terminal region is important for these interactions. To test  
226 this, we used the bacterial adenylate cyclase-based two hybrid (BACTH) assay. We designed  
227 BACTH constructs encoding truncated MreB mutants and then performed the interaction  
228 assays (Fig. 6). The N-terminal truncations of MreB interacted with full-length MreB (Fig.  
229 6A and summarized in B), providing a potential explanation for the localization data of  
230 MreB\_6xH truncations in *Chlamydia* (Suppl. Fig. 7). However, these truncated MreBs did  
231 not interact with RodZ, full-length FtsK, or the N-terminal region of FtsK lacking its ATPase  
232 domain whereas full-length MreB did interact with these constructs (Fig. 6C and summarized  
233 in D)(8, 22). From these data, we conclude that the extended N-terminal region is  
234 dispensable for MreB homo-oligomerization but is critical for interacting with other proteins  
235 involved in the cell division process.

## 236 **Discussion**

237 MreB is a well characterized rod-shape determining protein, which is conserved in  
238 most bacilli(18). When the *mreB* gene is deleted, the cell shape is changed from bacillus to  
239 coccoid in *E. coli*(18). MreB participates in organizing peptidoglycan (PG) synthesis by  
240 interacting with other proteins, such as MreC and RodZ, to direct Pbp2 and RodA activity at



241 the membrane(19, 23). Recently, MreB has been observed as a dynamic cytoskeletal protein  
242 forming short filaments that rotate around the membrane perpendicularly to the longitudinal  
243 axis of the cell(11). This motion is driven by PG synthesis and is critical for cell elongation  
244 and maintenance of rod shape(24). Given these characteristics and properties of MreB, it is  
245 surprising that *Chlamydia*, a Gram-negative coccoid bacterium that lacks PG in its cell wall,  
246 encodes MreB. To date, we have been unable to complement any structural components of  
247 the *E. coli* divisome using chlamydial orthologs (e.g. FtsQ(6)) or Mre system (MreB (this  
248 study) or RodZ(22)), which indicates the importance of recapitulating all necessary  
249 interactions to efficiently complement. In contrast, cytosolic components of the PG synthesis  
250 pathway possessing enzymatic activity have been shown to complement *E. coli* conditional  
251 mutants(25-27). These data are consistent with the notion that the PG synthesis machinery is  
252 conserved in *Chlamydia* but the mechanisms for spatially regulating its synthesis are not  
253 conserved. These observations further suggest that the maintenance of cell morphology may  
254 not be the primary function of chlamydial MreB(5, 28). Rather, given the function of  
255 chlamydial PG strictly in cell division, chlamydial MreB may primarily function in this  
256 process.

257         Since *Chlamydia* lacks the conserved cell division organizing protein FtsZ, we have  
258 hypothesized and presented evidence that MreB is a functional substitute for FtsZ(6-8, 22).  
259 However, this raises the intriguing question of how MreB, which is highly conserved  
260 between *Chlamydia* and phylogenetically unrelated bacteria, can serve as the divisome  
261 organizer. Interestingly, when MreB is reintroduced into MreB-depleted cells in *B. subtilis*, a  
262 budding shape is observed that is enriched in MreB(29). This eventually leads to recruitment  
263 of cell wall machinery and formation of a rod-shape. However, in *Chlamydia*, which also  
264 undergoes a budding-like polarized division, this process is spatially restricted, thus what  
265 prevents *Chlamydia* from continuing to synthesize PG to produce a rod shape? One



266 hypothesis is that chlamydial MreB exhibits a restricted distribution that is at least in part  
267 dependent upon its unique structural features, and we have shown here that the unique N-  
268 terminal region of chlamydial MreB can facilitate the membrane association of this  
269 cytoskeletal protein.

270           Initiating this study, our goal was to capture MreB localization at high resolution and  
271 at early stages of division since it becomes more difficult to resolve individual organisms  
272 within the inclusion as RBs multiply. However, we were unable to detect endogenous MreB  
273 using the previously reported antibody (13). We, therefore, took advantage of genetic tools  
274 that have been recently developed for *Chlamydia* to transform this bacterium with a plasmid  
275 construct encoding an inducible MreB\_6xH. Using this strategy, we detected MreB\_6xH  
276 localized at the division septum during the polarized division of the first RB. More  
277 interestingly, MreB formed a ring at the septum in the dividing cell that resembled the FtsZ-  
278 ring at the septum of *E. coli* (Fig.1). The septal MreB ring is very similar to the PG ring  
279 previously observed in *Chlamydia*(5). We speculate that the MreB puncta previously  
280 observed may be due to the low affinity of the MreB antibody as we were also unable to  
281 detect MreB at later stages during infection using this reagent. However, we also observed  
282 areas along the MreB-ring of more intense staining (Fig. 1 arrowhead). These regions may be  
283 the puncta reported previously and may represent areas of active PG synthesis. However, to  
284 date we have been unable to image both PG and MreB\_6xH, perhaps due to the aldehyde  
285 fixation methods required to preserve the budding morphology of chlamydiae. Given the  
286 effects of inhibiting MreB activity on chlamydial division and PG synthesis(7, 8, 16), these  
287 data further suggest that chlamydial MreB likely has a scaffolding function for cell divisome  
288 proteins to direct PG synthesis in a manner similar to the function of FtsZ in *E. coli*(30).

289           Many Gram-negative MreB homologs possess an amphipathic helix at their N-

290 terminus that allows MreB to associate with the inner membrane(9). *Chlamydia* species have  
291 conserved this feature. The most striking difference between the chlamydial species and other  
292 “canonical” MreB homologs is the presence of an extended N-terminus of 23 amino acids  
293 (aa1-23). Amphipathic prediction algorithms suggested this region possesses amphipathicity.  
294 Interestingly, canonical MreB filaments are excluded from areas of high membrane curvature  
295 in bacilli that are typically enriched in anionic phospholipids such as cardiolipin (i.e. the cell  
296 poles(31)), but *Chlamydia* are coccoid with its membrane displaying curvature similar to the  
297 poles of bacilli. Therefore, we hypothesized that the additional residues at the N-terminus of  
298 chlamydial MreB may allow it to associate more efficiently with membranes that exhibit  
299 curvature. In addition, these residues may be critical for establishing polarity in this organism  
300 as we previously observed that inhibiting MreB activity with A22 or MP265 not only blocks  
301 cell division but also depolarizes the RB(7, 8).

302         The amphipathic helix of canonical Gram-negative MreB homologs is critical for the  
303 association of MreB with membranes. This was demonstrated by two means: expressing two  
304 copies of the helix in tandem fused to the N-terminus of GFP and deleting the helix from  
305 MreB and assessing its localization(9). In the former, GFP was directed to the inner  
306 membrane(9). In the latter, MreB is no longer localized as membrane patches but rather as  
307 cytosolic aggregates in *E. coli*(9). Using the former approach, we observed that two copies,  
308 but not one copy, of the chlamydial amphipathic helix were sufficient to direct MreB to the  
309 membrane, consistent with what has been observed in *E. coli* (Fig. 4B). However, the  
310 additional N-terminal region of chlamydial MreB (aa1-23) together with a single copy of the  
311 conserved amphipathic region (aa24-28) directed GFP to the membrane. Intriguingly, the  
312 membrane localization was restricted to the cell polar region but did not appear to be an  
313 inclusion body since in an *mreB*-deficient mutant *E. coli*, which has a spherical morphology,  
314 the peptide fluorescence was more uniformly distributed in the membrane (Suppl. Fig. 4).

315 Whether this region recognizes specific lipid moieties that directs its polar localization is  
316 under investigation.

317 We conclude that the additional N-terminal region of chlamydial MreB encodes a  
318 membrane-targeting function. Indeed, this was supported by (i) the ability of this region to  
319 direct GFP to the membrane when expressed in *Chlamydia* and (ii) the loss of GFP  
320 membrane localization when the amphipathicity of the N-terminal region was disrupted by  
321 mutagenesis. We excluded any possible effects of alternative start codons encoded by leucine  
322 residues by replicating our results using the N-terminus of *C. suis*, which does not encode  
323 any UUG codons for leucine in this region. We propose that chlamydial MreB, with both its  
324 extended N-terminus and amphipathic helix, may be more tightly associated with membranes  
325 and is critical for it to form ring structures associated with regions of high membrane  
326 curvature.

327 As *Chlamydia* is an obligate intracellular bacterium, it is time-consuming and  
328 difficult to genetically modify its genes in a targeted manner, and there is a high failure rate  
329 in doing so. Ideally, we would create a conditional knockout such that we could express  
330 truncated mutants of chlamydial MreB in the absence of the chromosomal full-length copy.  
331 We did attempt to localize truncation mutants of MreB in *Chlamydia*, but only the mutant  
332 lacking all predicted amphipathicity showed reduced membrane localization (Suppl. Fig. 7).  
333 Not surprisingly, we detected interactions between the MreB truncations and the full-length  
334 MreB, thus one interpretation is that the truncations, when expressed in *Chlamydia*,  
335 interacted with full-length MreB (Fig. 6), which is itself at the membrane. Furthermore, the  
336 N-terminal region is important for interactions with other proteins related to cell division and  
337 PG synthesis. When the region was deleted, chlamydial MreB no longer interacted with  
338 RodZ and FtsK by bacterial two-hybrid analysis. One possible explanation of these data is

339 that the truncated MreB isoforms do not associate with the membrane efficiently enough to  
340 interact with the membrane proteins RodZ and FtsK. Nevertheless, these data suggest the  
341 extended N-terminal region may function as a scaffolding platform for MreB to interact with  
342 other proteins related to cell division and may be crucial for the cell divisome formation at  
343 the septum, like FtsZ.

344 Outstanding questions remain: how is polarity established in *Chlamydia*? Is it MreB-  
345 dependent or are other factors involved? Is MreB actively excluded from other parts of the  
346 membrane by an unknown system similar to the function of the MinCDE system in  
347 restricting FtsZ to division septa during binary fission? In this study, we performed the first  
348 systematic investigation of chlamydial MreB and its function as a cell division coordinator.  
349 Our data suggest that chlamydial MreB has multiple membrane-associating domains that  
350 may promote its assembly at the septum. This in turn may allow it to functionally substitute  
351 for the role of FtsZ in organizing the division septum.

## 352 **Materials and Methods**

### 353 **Organisms and Cell Culture**

354 McCoy (kind gift of Dr. Harlan Caldwell) and HeLa (ATCC, Manassas, VA) cells were  
355 cultured at 37°C with 5% CO<sub>2</sub> in Dulbecco's Modified Eagle Medium (DMEM; Invitrogen,  
356 Waltham, MA) containing 10% fetal bovine serum (FBS; Hyclone, Logan, UT) and 10  
357 µg/mL gentamicin (Gibco, Waltham, MA). *Chlamydia trachomatis* serovar L2 (strain 434/Bu)  
358 lacking the endogenous plasmid (-pL2) was infected and propagated in McCoy cells for use  
359 in transformations. HeLa cells were infected with chlamydial transformants in DMEM  
360 containing 10% FBS, 10 µg/mL gentamicin, 1 U/mL penicillin G, and 1 µg/mL  
361 cycloheximide. All cell cultures and chlamydial stocks were routinely tested for *Mycoplasma*

362 contamination using the Mycoplasma PCR detection kit (Sigma, St. Louis, MO). For *E. coli*,  
363 wild-type MG1655 and the *mreB*-deficient strain P2733 (kind gift of Dr. Piet de Boer) were  
364 cultured at 37°C with 225 rpm shaking in Lysogeny broth (LB) media containing no or  
365 several antibiotics as indicated: 50 µg/mL spectinomycin, 34 µg/mL chloramphenicol, or 25  
366 µg/mL tetracycline. All chemicals and antibiotics were obtained from Sigma unless otherwise  
367 noted.

## 368 **Cloning**

369 The plasmids and primers used in this study are described in Supplemental Table 1. The wild-  
370 type and truncated *Chlamydia trachomatis mreB* genes were amplified by PCR with Phusion  
371 DNA polymerase (NEB, Ipswich, MA) using 100 ng *C. trachomatis* L2 genomic DNA as a  
372 template. Some gene segments were directly synthesized as a gBlock fragment (Integrated  
373 DNA Technologies, Coralville, IA). The PCR products were purified using a PCR  
374 purification kit (Qiagen, Hilden, Germany). The HiFi Assembly reaction master mix (NEB)  
375 was used according to the manufacturer's instructions in conjunction with plasmids pASK-  
376 GFP-mKate2-L2 (kind gift of Dr. P. Scott Hefty) cut with FastDigest AgeI and EagI  
377 (ThermoFisher, Waltham, MA), pBOMB4-Tet (kind gift of Dr. Ted Hackstadt) cut with EagI  
378 and KpnI, pKT25 or pUT18C cut with BamHI and EcoRI, or pBAD33 cut with XbaI and  
379 SalI depending on the construct being prepared. All plasmids were also dephosphorylated  
380 with FastAP (ThermoFisher). The products of the HiFi reaction were transformed into either  
381 NEB-10beta (for chlamydial transformation plasmids) or DH5alpha (I<sup>q</sup>) competent cells  
382 (NEB), plated on appropriate antibiotics, and plasmids were subsequently isolated from  
383 individual colonies grown overnight in LB broth by using a mini-prep kit (Qiagen). For  
384 chlamydial transformation, the constructs were transformed into *dam<sup>-</sup> dcm<sup>-</sup>* competent cells  
385 (NEB) and purified as de-methylated constructs.

## 386 **Bioinformatics Analysis**

387 Sequences for *Chlamydia trachomatis* serovar L2/434, *Pseudomonas aeruginosa* (PAO1),  
388 and *Vibrio cholerae* (O395) were obtained from the NCBI database  
389 (<https://www.ncbi.nlm.nih.gov/>) and for *E. coli* MG1655 from Ecocyc database  
390 (<https://ecocyc.org/>)(32). Protein sequence alignment was performed using Clustal Omega  
391 website (<https://www.ebi.ac.uk/Tools/msa/clustalo/>)(33) and the ESPrpt3 program  
392 (<http://esprpt.ibcp.fr/>)(34). Helical wheels were made by using Helixator  
393 ([http://www.tcdb.org/progs/helical\\_wheel.php](http://www.tcdb.org/progs/helical_wheel.php))(35). Amphipathic helices were predicted by  
394 using Amphipaseek program ([https://npsa-prabi.ibcp.fr/cgi-](https://npsa-prabi.ibcp.fr/cgi-bin/npsa_automat.pl?page=/NPSA/npsa_amphipaseek.html)  
395 [bin/npsa\\_automat.pl?page=/NPSA/npsa\\_amphipaseek.html](https://npsa-prabi.ibcp.fr/cgi-bin/npsa_automat.pl?page=/NPSA/npsa_amphipaseek.html))(36).

## 396 **Transformation of *Chlamydia trachomatis***

397 McCoy cells were plated in a six-well plate the day before beginning the transformation  
398 procedure. *Chlamydia trachomatis* serovar L2 without plasmid (-pL2) (kind gift of Dr. Ian  
399 Clarke) was incubated with 2 µg demethylated plasmid in Tris-CaCl<sub>2</sub> buffer (10 mM Tris-Cl,  
400 50 mM CaCl<sub>2</sub>) for 30 min at room temperature. During this step, the McCoy cells were  
401 washed with 2 mL Hank's Balanced Salt Solution (HBSS) media containing Ca<sup>2+</sup> and Mg<sup>2+</sup>  
402 (Gibco). After that, McCoy cells were infected with the transformants in 2 mL HBSS per  
403 well. The plate was centrifuged at 400 *x g* for 15 min at room temperature and incubated at  
404 37°C for 15 min. The inoculum was aspirated, and DMEM containing 10% FBS and 10  
405 µg/mL gentamicin was added per well. At 8 h post infection (hpi), the media was changed to  
406 media containing 1 µg/mL cycloheximide and 1 or 2 U/mL penicillin G, and the plate was  
407 incubated at 37°C until 48 hpi. At 48 hpi, the transformants were harvested and used to infect  
408 a new McCoy cell monolayer. These harvest and infection steps were repeated every 48 hpi  
409 until mature inclusions were observed.

## 410 **Complementation assay**

411 The arabinose-inducible pBAD33 vectors encoding nothing, *E. coli* MreB, chlamydial MreB,  
412 or  $\Delta$ N22 chlamydial MreB were transformed into both wild-type (MG1655) and *mreB* mutant  
413 strains (P2733; kind gift of Dr. Piet de Boer). Chemically competent cells of each strain were  
414 prepared using standard techniques with  $\text{CaCl}_2$ . The strains were cultured overnight, diluted  
415 1/50 in LB media containing chloramphenicol (34  $\mu\text{g}/\text{mL}$ ), tetracycline (25  $\mu\text{g}/\text{mL}$ ) or  
416 spectinomycin (50  $\mu\text{g}/\text{mL}$ ) and cultured for 2 hours when 0.01% arabinose was added as an  
417 inducer or cells were left uninduced as a control. After 2 hours and 6 hours of induction, 4  $\mu\text{L}$   
418 of the cells were mounted on 1% LB agar pad and covered with a cover slip. The  
419 morphologies of the strains were observed by a Zeiss Imager.Z2 equipped with an Apotome2  
420 using a 100X objective.

## 421 **The localization of chlamydial MreB fusion proteins in *E. coli***

422 The *E. coli* MG1655 wild-type and  $\Delta$ *mreB* mutant (P2733) transformed with the arabinose-  
423 inducible pBAD33G vectors encoding GFP with various MreB N-terminal peptides were  
424 cultured at 37°C with 255 rpm shaking overnight. Overnight cultures were diluted 1:100  
425 (MG1655) or 1:50 (P2733) in LB media containing appropriate antibiotics and cultured at 37°C  
426 with 255 rpm shaking. After 2 hours of shaking, the cells were induced, or not, with 0.05%  
427 (w/v) arabinose and cultured for more 2 hours. Before mounting the samples, SynaptoRed-  
428 C2 (FM4-64; Cayman Chemical, Ann Arbor, MI) was added in the samples to a final  
429 concentration 1.5  $\mu\text{M}$  to stain the membrane. After 15 min, 4  $\mu\text{L}$  of each culture were placed  
430 on 1% LB agar pad and covered with coverslip. The samples were observed with a Zeiss  
431 Imager.Z2 equipped with an Apotome2 using a 100X objective.

## 432 **Indirect Immunofluorescence (IFA) Microscopy**

433 HeLa cells were seeded in 24-well plates on coverslips at a density of  $10^5$  cells per well the  
434 day before infection. Chlamydial strains expressing wild-type or truncated MreBs with a six-  
435 histidine tag at the C-terminus were used to infect HeLa cells in DMEM media containing  
436 penicillin G and cycloheximide. At 6 hpi, 10 nM anhydrotetracycline (aTc) was added. At  
437 10.5 hpi, the coverslips of infected cells were washed with DPBS and fixed with fixing  
438 solution (3.2% formaldehyde and 0.022% glutaraldehyde in DPBS) for 2 min. The samples  
439 were then washed three times with DPBS and permeabilized with ice-cold 90% methanol for  
440 1 min. Afterwards, the fixed cells were labeled with primary antibodies including goat anti-  
441 major outer-membrane protein (MOMP; Meridian, Memphis, TN), rabbit anti-MreB<sub>CT</sub>  
442 antibody (custom anti-peptide antibody directed against the C-terminus of *C. trachomatis*  
443 serovar L2 MreB; ThermoFisher), rabbit anti-Hsp60 (kind gift of Dr. Rick Morrison), mouse  
444 and rabbit anti-six histidine tag (Genscript, Nanjing, China and Abcam, Cambridge, UK,  
445 respectively). Secondary antibodies donkey anti-goat antibody (594), donkey anti-rabbit  
446 antibody (647), and donkey anti-mouse (488) were used to visualize the primary antibodies.  
447 The secondary antibodies were obtained from Invitrogen. Coverslips were observed by using  
448 either a Zeiss LSM 800 confocal microscope or a super-resolution SIM scope (Zeiss ELYRA  
449 PS.1).

## 450 **BACTH Assay**

451 Competent DHT1 *E. coli*, an adenylate cyclase-deficient strain, were co-transformed with  
452 pKT25 and pUT18C vectors encoding the genes of interest or empty vectors and spread on  
453 M63 minimal media plates containing 50 µg/mL ampicillin, 25 µg/mL kanamycin, 0.5 mM  
454 IPTG, 40 µg/mL X-gal, 0.04% casamino acid, and 0.2% maltose. The plates were incubated  
455 at 30°C for 5-7 days. Blue colonies indicate positive interactions whereas no growth or small  
456 white colonies indicate no interactions.



## 457 **Acknowledgments**

458 The authors would like to thank Dr. Lisa Rucks for critical review of the manuscript. The  
459 authors would like to thank the following individuals for providing reagents used in this  
460 study: Dr. Harlan Caldwell (National Institute of Health), Dr. Ian Clarke (University of  
461 Southampton), Dr. Piet de Boer (Case Western University), Dr. Ted Hackstadt (Rocky  
462 Mountain Labs/NIH), Dr. P. Scott Hefty (University of Kansas), and Dr. Rick Morrison  
463 (University of Arkansas for Medical Sciences). This work was supported by a grant from the  
464 National Institute for General Medical Science (R35GM124798-01) within the National  
465 Institutes of Health to SPO. The University of Nebraska Medical Center Advanced  
466 Microscopy Core Facility receives partial support from the National Institute for General  
467 Medical Science INBRE - P20 GM103427 and COBRE - P30 GM106397 grants, as well as  
468 support from the National Cancer Institute (NCI) for The Fred & Pamela Buffett Cancer  
469 Center Support Grant- P30 CA036727 and the Nebraska Research Initiative.

## 470 **Figure legend**

471 **Figure 1. Localization of chlamydial MreB\_6xH in *C. trachomatis* using structured**  
472 **illumination microscopy (SIM).** *C. trachomatis* without plasmid (-pL2) was transformed  
473 with an anhydrotetracycline (aTc)-inducible vector encoding chlamydial MreB with a six-  
474 histidine (6xH) tag at the C-terminus. HeLa cells were infected with this strain and  
475 chlamydial MreB\_6xH expression was induced with 10 nM aTc at 6 hpi. At 10.5 hpi, the  
476 infected cells were fixed (3.2% Formaldehyde, 0.022% Glutaraldehyde in PBS) for 2 min  
477 and permeabilized with 90% methanol (MeOH) for 1 min. The sample was stained for major  
478 outer membrane protein (MOMP; red) and chlamydial MreB (green). Three representative  
479 images are displayed. The arrowheads indicate regions of more intense fluorescence.  
480 Structured illumination microscope (SIM) images were acquired on a Zeiss ELYRA PS.1

481 super-resolution microscope. The scale bar = 0.5  $\mu\text{m}$ .

482 **Figure 2. Bioinformatics analysis of chlamydial MreB.** Chlamydial MreB has unique  
483 structural features based on bioinformatics analyses. (A) Protein sequence alignment of  
484 chlamydial and other bacterial MreBs. The blue box represents the extended N-terminus and  
485 predicted amphipathic helix of chlamydial MreB. The alignment was performed with Clustal  
486 Omega (<https://www.ebi.ac.uk/Tools/msa/clustalo/>) and represented with ESPrnt 3.0  
487 (<http://esprnt.ibcp.fr>). (B) The amphipathic score and the predicted secondary structure of  
488 the N-terminus of chlamydial MreB. The prediction of amphipathicity is performed by using  
489 AMPHIPASEEK. The blue and red residues represent the extended N-terminus and predicted  
490 amphipathic helix, respectively. (C) The amphipathicity of the fragments of the N-terminal  
491 region of chlamydial MreB. These amphipathic structures were predicted by an online helical  
492 wheel program, named Helixator ([http://www.tcdb.org/progs/helical\\_wheel.php](http://www.tcdb.org/progs/helical_wheel.php)). The circles  
493 represent the indicated amino acid residues. (yellow circle: non-polar residue; green circle:  
494 uncharged polar residue; red circle: basic polar residue; blue circle: acidic polar residue).

495 **Figure 3. Localization in *E. coli* of various N-terminal regions of chlamydial MreB fused**  
496 **to GFP.** Wild-type MG1655 *E. coli* was transformed with the arabinose-inducible vectors  
497 encoding GFP fusions with various N-terminal regions of chlamydial MreB (A-C).  
498 Stationary phase cultures strains were diluted 1:100 in LB media containing 34  $\mu\text{g/ml}$   
499 chloramphenicol and cultured for 2 h. The cells were then induced or not with 0.05% (w/v)  
500 arabinose and cultured for 2 h more. To stain the membrane, SynaptoRed-C2 (FM4-64) was  
501 added to the samples at a final concentration of 1.5  $\mu\text{M}$ . After 15 min, 4  $\mu\text{L}$  of each culture  
502 was spotted under a 1% LB agar pad and covered with a coverslip. The images were acquired  
503 on a Zeiss Imager.Z2 equipped with an Apotome2 using a 100X objective. (A) The structure  
504 of the various N-terminal MreB-GFP fusion peptides. In the boxed region containing the N-

505 terminus of chlamydial MreB; red residues represent the predicted amphipathic helix  
506 residues. Red constructs show the membrane localization and black constructs show  
507 cytosolic localization. (B) The localization of various N-terminal regions of chlamydial  
508 MreB fused to GFP in MG1655. Note the polar membrane localization of the MreB<sub>1-28aa</sub>-GFP.  
509 Scale bar = 2  $\mu$ m. (C) A zoomed image of MreB<sub>1-28aa</sub>-GFP localization represented by the box  
510 in (B). The arrowheads represent the polar membrane localization of the MreB<sub>1-28aa</sub>-GFP.  
511 Scale bar = 0.5  $\mu$ m.

512 **Figure 4. Localization in *C. trachomatis* of various N-terminal regions of chlamydial**  
513 **MreB fused to GFP.** *C. trachomatis* serovar L2 without plasmid (-pL2) was transformed  
514 with anhydrotetracycline (aTc)-inducible vectors encoding (A) GFP, (B) chlamydial MreB<sub>1-</sub>  
515 <sub>23aa</sub>-GFP fusion peptide, or (C) chlamydial MreB<sub>1-28aa</sub>-GFP fusion peptide. HeLa cells were  
516 infected with the indicated strains, and expression of the GFP fusions was induced at 6 hpi or  
517 16 hpi with 10 nM aTc. At 10.5 hpi or 20 hpi, the samples were fixed (3.2% Formaldehyde,  
518 0.022% Glutaraldehyde in 1X PBS) for 2 min and permeabilized with 90% methanol (MeOH)  
519 for 1 min. These samples were stained for major outer membrane protein (MOMP; red) with  
520 GFP imaged in green. The arrowheads represent the MreB<sub>1-23aa</sub>-GFP localized at the  
521 membrane. Images were acquired on a Zeiss LSM 800 confocal microscope with 63X  
522 objective. Scale bar = 0.5  $\mu$ m (10.5 hpi) or 1  $\mu$ m (20 hpi).

523 **Figure 5. Localization in *C. trachomatis* of various mutated N-terminal regions of**  
524 **chlamydial MreB fused to GFP.** (A) Mutations were introduced into the N-terminal region  
525 of chlamydial MreB and modeled for their effect on amphipathicity. L7K, L22R, and F25K  
526 (red residues) mutations disrupted the predicted amphipathicity (see Figure 2 for comparison).  
527 (B) *C. trachomatis* serovar L2 without plasmid (-pL2) was transformed with  
528 anhydrotetracycline (aTc)-inducible vectors encoding the mutated chlamydial MreB<sub>1-23aa</sub>-

529 GFP or MreB<sub>1-28aa</sub>-GFP fusion peptide. HeLa cells were infected with the indicated strains,  
530 and expression of the GFP fusions was induced at 6 hpi or 16 hpi with 10 nM aTc. At 10.5  
531 hpi or 20 hpi, the samples were fixed (3.2% Formaldehyde, 0.022% Glutaraldehyde in 1X  
532 PBS) for 2 min and permeabilized with 90% methanol (MeOH) for 1 min. These samples  
533 were stained for major outer membrane protein (MOMP; red) with GFP imaged in green.  
534 Images were acquired on a Zeiss Imager.Z2 equipped with an Apotome2 using a 100X  
535 objective. Scale bar = 1  $\mu$ m (10.5 hpi) or 2  $\mu$ m (20 hpi).

536 **Figure 6. BACTH assay to test protein-protein interactions of full-length and truncated**  
537 **chlamydial MreB.** *E. coli* DHT1 ( $\Delta$ *cy**a*) was co-transformed with vectors encoding the  
538 indicated genes fused to the T25 and T18 catalytic domains of the *B. pertussis* adenylate  
539 cyclase. Transformants were plated on M63 minimal medium plates containing 50  $\mu$ g/mL  
540 ampicillin, 25  $\mu$ g/mL kanamycin, 0.5 mM IPTG, 40  $\mu$ g/mL X-gal, 0.04% casamino acid, and  
541 0.2% maltose. The plates were incubated at 30°C for 5-7 days. (A) BACTH assay of the  
542 interaction between full-length and truncated chlamydial MreBs. (B) BACTH assay of the  
543 interaction between full-length or truncated chlamydial MreBs and previously described  
544 chlamydial cell division components FtsK, the N-terminal domain of FtsK (FtsKN), and  
545 RodZ. A positive (+) control is the interaction between T25-Zip and T18-Zip, the GCN4  
546 leucine zipper motif, and a negative (-) control is the lack of interaction between T25 and the  
547 mixture of T18-MreB and T18- $\Delta$ N22 MreB. These tests were performed a minimum of two  
548 times. ‘+’: Interaction; ‘-’: No interaction; Slash box: Not tested.

549 **Supplementary Figure 1. Localization of chlamydial MreB\_GFPsw proteins in *C.***  
550 ***trachomatis*.** HeLa cells were infected with *C. trachomatis* transformants containing aTc-  
551 inducible vectors encoding MreB\_GFPsw proteins. At 12 hpi, expression of the GFP  
552 sandwich fusions was induced with 10 nM aTc, and the samples were fixed (3.2%

553 Formaldehyde, 0.022% Glutaraldehyde in 1X PBS) at 16 hpi for 2 min and permeabilized  
554 with 90% methanol. The samples were stained for major outer membrane protein (MOMP;  
555 red) and GFP (green). Images were acquired on a Zeiss LSM 800 confocal microscope. Scale  
556 bar = 1  $\mu\text{m}$

557 **Supplementary Figure 2. Protein sequence alignment of the N-terminus of MreB from**  
558 **diverse *Chlamydia* phylum members.** The extended N-terminus of chlamydial MreB is  
559 conserved across *Chlamydia*. (A) The alignment was performed with Clustal Omega  
560 (<https://www.ebi.ac.uk/Tools/msa/clustalo/>) and represented with ESPript 3.0  
561 (<http://esprict.ibcp.fr>). (B) The AMPHIPASEEK prediction of amphipathicity for the *Waddlia*  
562 MreB ortholog. The blue and red residues represent the extended N-terminus and predicted  
563 amphipathic helix, respectively.

564 **Supplementary Figure 3. Test of complementation of chlamydial MreB in *E. coli* and**  
565 **interaction between chlamydial and *E. coli* MreBs by BACTH.** An *E. coli mreB*-deficient  
566 mutant (P2733) strain was transformed with an empty arabinose-inducible vector (A) or  
567 vectors encoding *E. coli* MreB (B), chlamydial MreB (C), or truncated chlamydial MreB  
568 lacking the extended N-terminal region (D). Stationary phase cultures were diluted to 1:50 in  
569 LB media containing 50  $\mu\text{g}/\text{mL}$  spectinomycin, 25  $\mu\text{g}/\text{mL}$  tetracycline, and 34  $\mu\text{g}/\text{mL}$   
570 chloramphenicol and cultured at 37°C with 225 rpm shaking for 2 h. The cells were then  
571 induced or not with 0.01% (w/v) arabinose. After induction, 4  $\mu\text{L}$  of each culture at 2 h and 6  
572 h were spotted under a 1% LB agar pad and covered with a coverslip. Images were acquired  
573 on a Zeiss Imager.Z2 equipped with an Apotome2 using a 100X objective. The arrows  
574 indicate the cells complemented by the induction of *E. coli* MreB. Scale bar = 2  $\mu\text{m}$ . (E)  
575 BACTH assays were carried out to test interactions between chlamydial MreB and *E. coli*  
576 MreB. DHT1 *E. coli* were co-transformed with plasmids encoding the indicated fusion

577 proteins and plated on M63 minimal medium containing 50 µg/mL ampicillin, 25 µg/mL  
578 kanamycin, 0.5 mM IPTG, 40 µg/mL X-gal, 0.04% casamino acid, and 0.2% maltose. The  
579 plates were incubated at 30°C for 5-7 days. A positive control is the interaction between T25-  
580 zip and T18-zip. A negative control is the lack of interaction between T25 and T18-  
581 chlamydial MreB and T18-*E. coli* MreB. These tests were performed a minimum of two  
582 times. (F) Western blotting was performed to test the expression of chlamydial MreB in  
583 strains used in the complementation assay depicted in (C&D). Whole cell lysates from  
584 cultures tested in the complementation assay were separated by SDS-PAGE and transferred  
585 to a PVDF membrane. The chlamydial MreB was detected with rabbit anti-MreB primary  
586 antibody and IRDye goat anti-rabbit 800CW (LI-COR, Lincoln, NE).

587 **Supplementary Figure 4. Localization of chlamydial N-terminal MreB-GFP fusion**  
588 **proteins in an *E. coli*  $\Delta$ *mreB* mutant strain (P2733).** The *E. coli*  $\Delta$ *mreB* mutant (P2733)  
589 was transformed with the arabinose-inducible vectors encoding GFP fused with diverse N-  
590 terminal regions of chlamydial MreB. Samples were prepared as described in the legend to  
591 Figure 4 with the membrane labeled with FM4-64. Images were acquired on a Zeiss  
592 Imager.Z2 equipped with an Apotome2 using a 100X objective. Scale bar = 2 µm.

593 **Supplementary Figure 5. Localization of various N-terminal regions of chlamydial**  
594 **MreB fused to GFP in A22-treated *C. trachomatis*.** *C. trachomatis* without plasmid (-pL2)  
595 was transformed with anhydrotetracycline (aTc)-inducible vectors encoding chlamydial  
596 MreB<sub>1-23aa</sub>-GFP fusion peptide (A), chlamydial MreB<sub>1-28aa</sub>-GFP fusion peptide (B), or  
597 chlamydial MreB<sub>6xH</sub> (C). At 16 hpi, expression of the constructs was induced with 10 nM  
598 aTc, and at 18 hpi, 75 µM A22 was added to disrupt MreB localization. The samples were  
599 fixed at 20hpi with 1X DPBS containing 3.2% formaldehyde and 0.022% glutaraldehyde for  
600 2 min. Afterwards, the samples were permeabilized with 90% methanol for 1 min. These

601 samples were stained for major outer membrane protein (MOMP; red). The arrowheads show  
602 the membrane localization of the MreB<sub>1-23aa</sub>-GFP peptide. Images were acquired on a Zeiss  
603 Imager.Z2 equipped with an Apotome2 using a 100X objective. Scale bar = 2  $\mu$ m.

604 **Supplementary Figure 6. Localization of the N-terminus of *C. suis* MreB-GFP fusion**

605 **peptides in *C. trachomatis* and *E. coli*.** (A) The predicted amphipathicity of the N-terminus

606 of *C. suis* (Cs) MreB. (B) A helical wheel prediction is shown. (C) The CsMreB<sub>1-23aa</sub>-GFP

607 peptide is localized in the cytosol in *E. coli*. In contrast, the CsMreB<sub>1-28aa</sub>-GFP peptide is

608 localized at the membrane at the poles of *E. coli*. These patterns are the same as those of *C.*

609 *trachomatis* (see Figure 3). (D, E) HeLa cells were infected with *C. trachomatis*

610 transformants containing aTc-inducible vectors encoding CsMreB<sub>1-23aa</sub>-GFP or CsMreB<sub>1-28aa</sub>-

611 GFP fusion proteins. Expression of these fusion proteins was induced at 6 hpi or 16 hpi with

612 10 nM aTc. At 10.5 hpi or 20 hpi, the samples were fixed (3.2% Formaldehyde, 0.022%

613 Glutaraldehyde in 1X PBS) for 2 min and permeabilized with 90% methanol (MeOH) for 1

614 min. These samples were stained for major outer membrane protein (MOMP; red) with GFP

615 imaged in green. The arrowheads indicate the CsMreB<sub>1-23aa</sub>-GFP localized at the membrane

616 (see also Figure 4). Images were acquired on a Zeiss LSM 800 confocal microscope with

617 63X objective. Scale bar = 0.5  $\mu$ m (10.5 hpi) or 1  $\mu$ m (20 hpi).

618 **Supplementary Figure 7. The localization of various truncated chlamydial MreBs in *C.***

619 ***trachomatis* L2.** (A) Representation of the various truncated chlamydial MreBs tested. The

620 blue and red residues represent the extended N-terminus and predicted amphipathic helix,

621 respectively. (B) *C. trachomatis* serovar L2 transformants containing aTc-inducible vectors

622 encoding the truncated MreBs were used to infect HeLa cells. At 16 hpi, expression of the

623 MreB<sub>6xH</sub> constructs was induced with 10 nM aTc, and these samples were fixed (3.2%

624 Formaldehyde, 0.022% Glutaraldehyde in 1X DPBS) at 20 hpi for 2 min and permeabilized



625 with 90% methanol. The samples were stained for major outer membrane protein (MOMP;  
626 red) and six histidine tag (green). Images were acquired on a Zeiss Imager.Z2 equipped with  
627 an Apotome2 using a 100X objective. The white box represents the cells which are zoomed  
628 in at the upper right. Scale bar = 2  $\mu\text{m}$ .

629 **Supplementary Table 1. List of Plasmids, Strains, and Primers Used in the Study.**

630 **References**

- 631 1. Abdelrahman YM, Belland RJ. 2005. The chlamydial developmental cycle. *FEMS*  
632 *Microbiol Rev* 29:949-59.
- 633 2. Moore ER, Ouellette SP. 2014. Reconceptualizing the chlamydial inclusion as a  
634 pathogen-specified parasitic organelle: an expanded role for Inc proteins. *Front Cell*  
635 *Infect Microbiol* 4:157.
- 636 3. Stephens RS, Kalman S, Lammel C, Fan J, Marathe R, Aravind L, Mitchell W,  
637 Olinger L, Tatusov RL, Zhao Q, Koonin EV, Davis RW. 1998. Genome sequence of  
638 an obligate intracellular pathogen of humans: *Chlamydia trachomatis*. *Science*  
639 282:754-9.
- 640 4. Bi EF, Lutkenhaus J. 1991. FtsZ ring structure associated with division in *Escherichia*  
641 *coli*. *Nature* 354:161-4.
- 642 5. Liechti GW, Kuru E, Hall E, Kalinda A, Brun YV, VanNieuwenhze M, Maurelli AT.  
643 2014. A new metabolic cell-wall labelling method reveals peptidoglycan in  
644 *Chlamydia trachomatis*. *Nature* 506:507-10.
- 645 6. Ouellette SP, Rueden KJ, AbdelRahman YM, Cox JV, Belland RJ. 2015.  
646 Identification and Partial Characterization of Potential FtsL and FtsQ Homologs of  
647 *Chlamydia*. *Front Microbiol* 6:1264.
- 648 7. Abdelrahman Y, Ouellette SP, Belland RJ, Cox JV. 2016. Polarized Cell Division of  
649 *Chlamydia trachomatis*. *PLoS Pathog* 12:e1005822.
- 650 8. Ouellette SP, Karimova G, Subtil A, Ladant D. 2012. *Chlamydia* co-opts the rod  
651 shape-determining proteins MreB and Pbp2 for cell division. *Mol Microbiol* 85:164-  
652 78.
- 653 9. Salje J, van den Ent F, de Boer P, Lowe J. 2011. Direct membrane binding by  
654 bacterial actin MreB. *Mol Cell* 43:478-87.



- 655 10. Srinivasan R, Mishra M, Murata-Hori M, Balasubramanian MK. 2007. Filament  
656 formation of the *Escherichia coli* actin-related protein, MreB, in fission yeast. *Curr*  
657 *Biol* 17:266-72.
- 658 11. van Teeffelen S, Wang S, Furchtgott L, Huang KC, Wingreen NS, Shaevitz JW, Gitai  
659 Z. 2011. The bacterial actin MreB rotates, and rotation depends on cell-wall assembly.  
660 *Proc Natl Acad Sci U S A* 108:15822-7.
- 661 12. Strahl H, Burmann F, Hamoen LW. 2014. The actin homologue MreB organizes the  
662 bacterial cell membrane. *Nat Commun* 5:3442.
- 663 13. Kemege KE, Hickey JM, Barta ML, Wickstrum J, Balwalli N, Lovell S, Battaile KP,  
664 Hefty PS. 2015. *Chlamydia trachomatis* protein CT009 is a structural and functional  
665 homolog to the key morphogenesis component RodZ and interacts with division  
666 septal plane localized MreB. *Mol Microbiol* 95:365-82.
- 667 14. Bendezu FO, Hale CA, Bernhardt TG, de Boer PA. 2009. RodZ (YfgA) is required  
668 for proper assembly of the MreB actin cytoskeleton and cell shape in *E. coli*. *EMBO J*  
669 28:193-204.
- 670 15. Swulius MT, Jensen GJ. 2012. The helical MreB cytoskeleton in *Escherichia coli*  
671 MC1000/pLE7 is an artifact of the N-Terminal yellow fluorescent protein tag. *J*  
672 *Bacteriol* 194:6382-6.
- 673 16. Liechti G, Kuru E, Packiam M, Hsu YP, Tekkam S, Hall E, Rittichier JT,  
674 VanNieuwenhze M, Brun YV, Maurelli AT. 2016. Pathogenic *Chlamydia* Lack a  
675 Classical Saccus but Synthesize a Narrow, Mid-cell Peptidoglycan Ring, Regulated  
676 by MreB, for Cell Division. *PLoS Pathog* 12:e1005590.
- 677 17. Wang S, Arellano-Santoyo H, Combs PA, Shaevitz JW. 2010. Actin-like cytoskeleton  
678 filaments contribute to cell mechanics in bacteria. *Proc Natl Acad Sci U S A*  
679 107:9182-5.
- 680 18. Bendezu FO, de Boer PA. 2008. Conditional lethality, division defects, membrane  
681 involution, and endocytosis in *mre* and *mrd* shape mutants of *Escherichia coli*. *J*  
682 *Bacteriol* 190:1792-811.
- 683 19. Fenton AK, Gerdes K. 2013. Direct interaction of FtsZ and MreB is required for  
684 septum synthesis and cell division in *Escherichia coli*. *EMBO J* 32:1953-65.
- 685 20. McCarthy JE, Brimacombe R. 1994. Prokaryotic translation: the interactive pathway  
686 leading to initiation. *Trends Genet* 10:402-7.
- 687 21. Kruse T, Bork-Jensen J, Gerdes K. 2005. The morphogenetic MreBCD proteins of

- 688 *Escherichia coli* form an essential membrane-bound complex. *Mol Microbiol* 55:78-  
689 89.
- 690 22. Ouellette SP, Rueden KJ, Gauliard E, Persons L, de Boer PA, Ladant D. 2014.  
691 Analysis of MreB interactors in *Chlamydia* reveals a RodZ homolog but fails to  
692 detect an interaction with MraY. *Front Microbiol* 5:279.
- 693 23. van den Ent F, Johnson CM, Persons L, de Boer P, Lowe J. 2010. Bacterial actin  
694 MreB assembles in complex with cell shape protein RodZ. *EMBO J* 29:1081-90.
- 695 24. Morgenstein RM, Bratton BP, Nguyen JP, Ouzounov N, Shaevitz JW, Gitai Z. 2015.  
696 RodZ links MreB to cell wall synthesis to mediate MreB rotation and robust  
697 morphogenesis. *Proc Natl Acad Sci U S A* 112:12510-5.
- 698 25. Hesse L, Bostock J, Dementin S, Blanot D, Mengin-Lecreulx D, Chopra I. 2003.  
699 Functional and Biochemical Analysis of *Chlamydia trachomatis* MurC, an Enzyme  
700 Displaying UDP-N-Acetylmuramate:Amino Acid Ligase Activity. *Journal of*  
701 *Bacteriology* 185:6507-6512.
- 702 26. McCoy AJ, Maurelli AT. 2005. Characterization of *Chlamydia* MurC-Ddl, a fusion  
703 protein exhibiting D-alanyl-D-alanine ligase activity involved in peptidoglycan  
704 synthesis and D-cycloserine sensitivity. *Mol Microbiol* 57:41-52.
- 705 27. Patin D, Bostock J, Blanot D, Mengin-Lecreulx D, Chopra I. 2009. Functional and  
706 biochemical analysis of the *Chlamydia trachomatis* ligase MurE. *J Bacteriol*  
707 191:7430-5.
- 708 28. Fox A, Rogers JC, Gilbert J, Morgan S, Davis CH, Knight S, Wyrick PB. 1990.  
709 Muramic acid is not detectable in *Chlamydia psittaci* or *Chlamydia trachomatis* by  
710 gas chromatography-mass spectrometry. *Infect Immun* 58:835-7.
- 711 29. Hussain S, Wivagg CN, Szwedziak P, Wong F, Schaefer K, Izore T, Renner LD,  
712 Holmes MJ, Sun Y, Bisson-Filho AW, Walker S, Amir A, Lowe J, Garner EC. 2018.  
713 MreB filaments align along greatest principal membrane curvature to orient cell wall  
714 synthesis. *Elife* 7.
- 715 30. Hale CA, de Boer PA. 1997. Direct binding of FtsZ to ZipA, an essential component  
716 of the septal ring structure that mediates cell division in *E. coli*. *Cell* 88:175-85.
- 717 31. Kawazura T, Matsumoto K, Kojima K, Kato F, Kanai T, Niki H, Shiomi D. 2017.  
718 Exclusion of assembled MreB by anionic phospholipids at cell poles confers cell  
719 polarity for bidirectional growth. *Mol Microbiol* 104:472-486.
- 720 32. Keseler IM, Mackie A, Santos-Zavaleta A, Billington R, Bonavides-Martinez C,

- 721 Caspi R, Fulcher C, Gama-Castro S, Kothari A, Krummenacker M, Latendresse M,  
722 Muniz-Rascado L, Ong Q, Paley S, Peralta-Gil M, Subhraveti P, Velazquez-Ramirez  
723 DA, Weaver D, Collado-Vides J, Paulsen I, Karp PD. 2017. The EcoCyc database:  
724 reflecting new knowledge about Escherichia coli K-12. *Nucleic Acids Res* 45:D543-  
725 D550.
- 726 33. Madeira F, Park YM, Lee J, Buso N, Gur T, Madhusoodanan N, Basutkar P, Tivey  
727 ARN, Potter SC, Finn RD, Lopez R. 2019. The EMBL-EBI search and sequence  
728 analysis tools APIs in 2019. *Nucleic Acids Res* doi:10.1093/nar/gkz268.
- 729 34. Robert X, Gouet P. 2014. Deciphering key features in protein structures with the new  
730 ENDscript server. *Nucleic Acids Res* 42:W320-4.
- 731 35. Saier MH, Jr., Reddy VS, Tsu BV, Ahmed MS, Li C, Moreno-Hagelsieb G. 2016. The  
732 Transporter Classification Database (TCDB): recent advances. *Nucleic Acids Res*  
733 44:D372-9.
- 734 36. Sapay N, Guermeur Y, Deleage G. 2006. Prediction of amphipathic in-plane  
735 membrane anchors in monotopic proteins using a SVM classifier. *BMC*  
736 *Bioinformatics* 7:255.
- 737

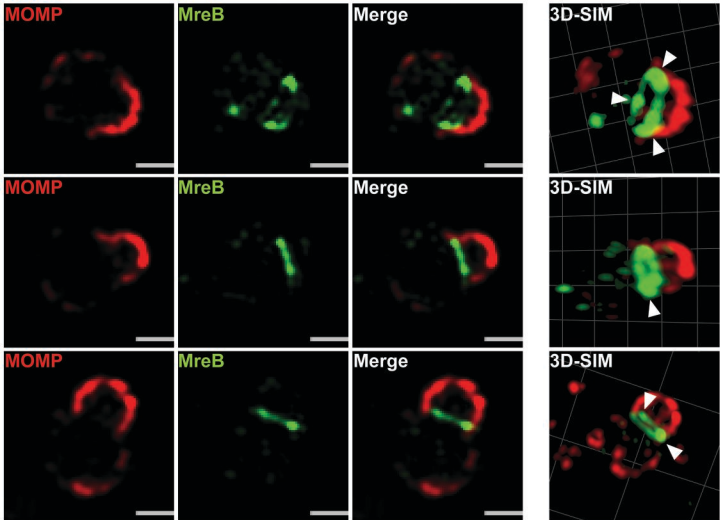

Figure 1

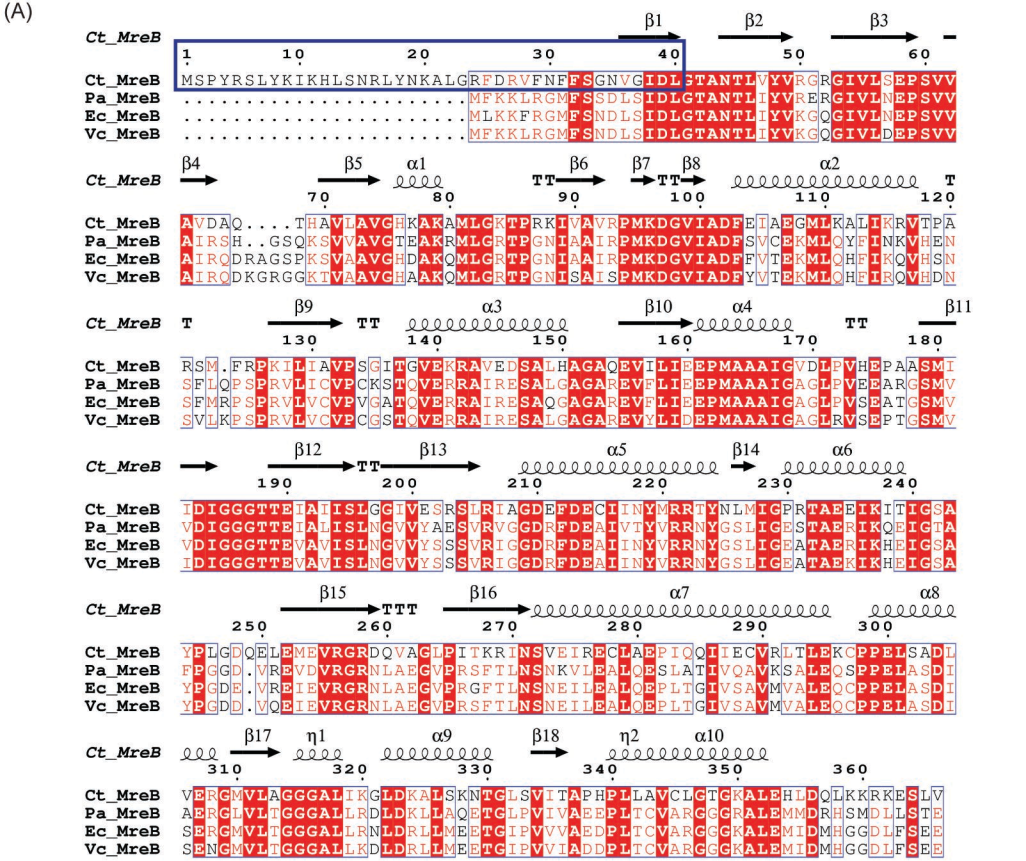

(B)

Amino acid **MSPYRSLYKIKHLSNRLYNKALRFDRVFNFFSGNVGIDL...**  
 2<sup>nd</sup> structure **ccccchhhhhhhhhhhhhhhhhhhhhhhhhhhhhhhhhhhhhhhhhccccc...**  
 Amphipathic(A) score **23344344343444434344555545444432112222...**  
 Extra N-terminal region in *C. trachomatis*  
 Predicted Amphipathic helix residues

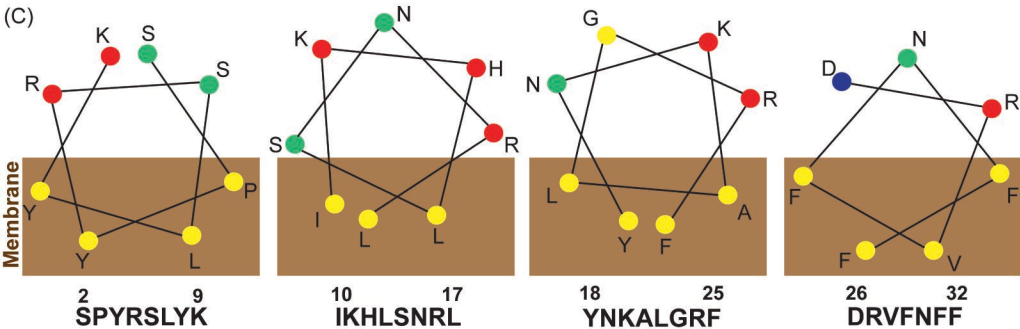

Figure 2



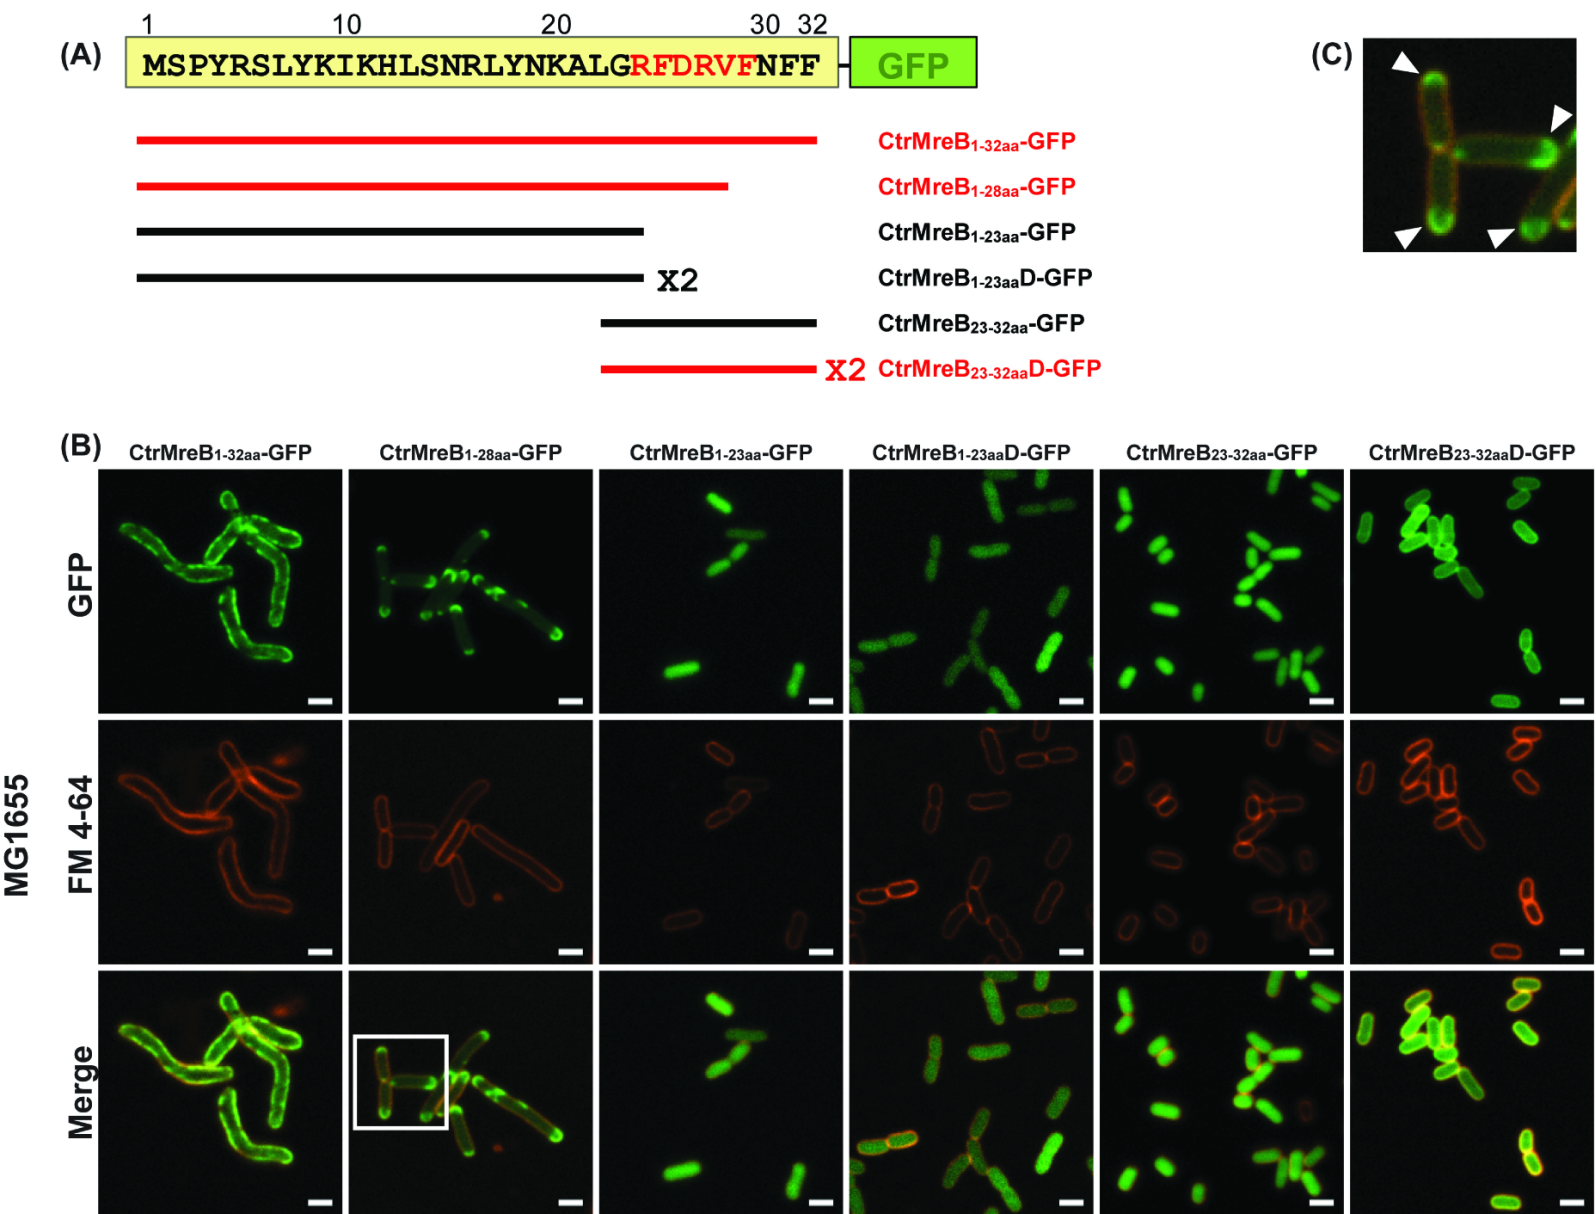

Figure 3

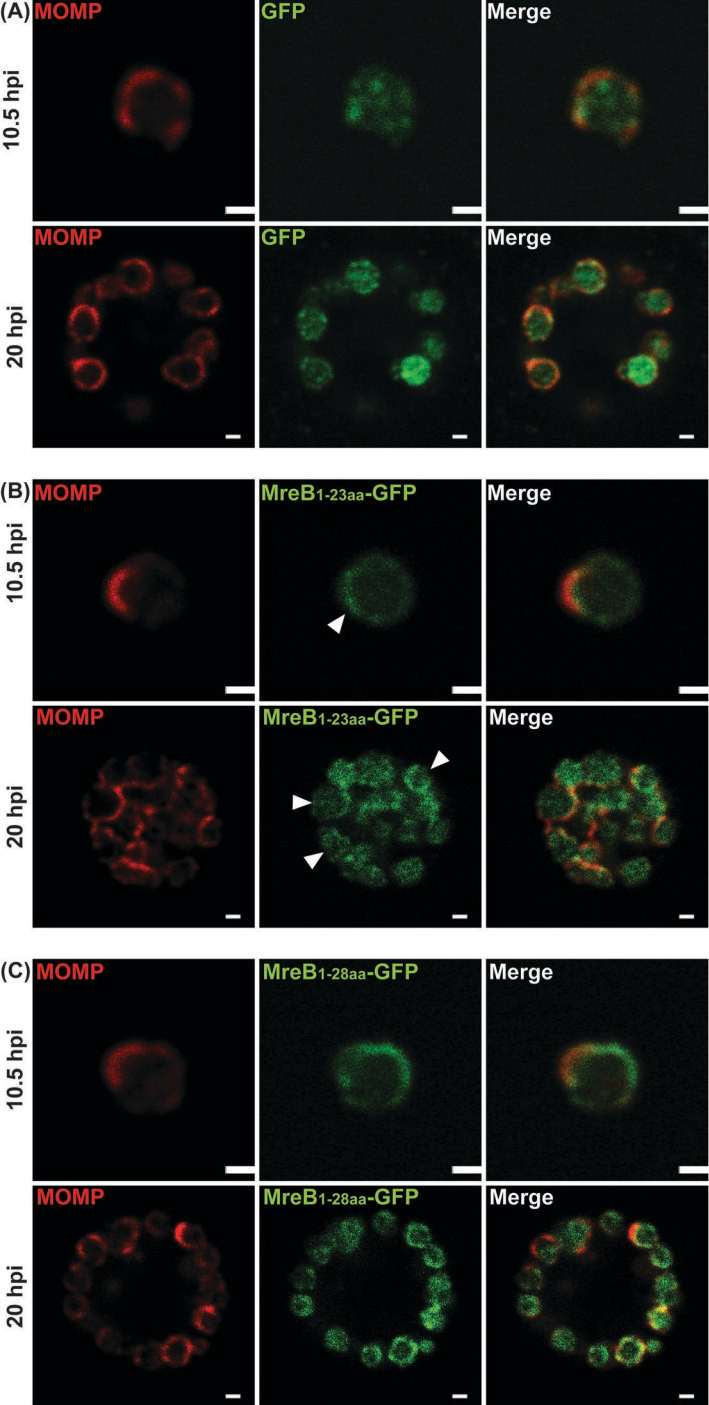

Figure 4

(A)

10                      20                      30

Amino acid of mutant **MSPYRSKYKIKHLSNRLYNKARGRK**DRVFNFFSGNVGIDL...

2<sup>nd</sup> structure ccccccc?ee?ccccccccchhhhhhhhhhhccccceec...

Amphipathic(A) score 22233233333344444443222233223334421112222...

Extra N-terminal region in *C.trachomatis*

The substituted residues

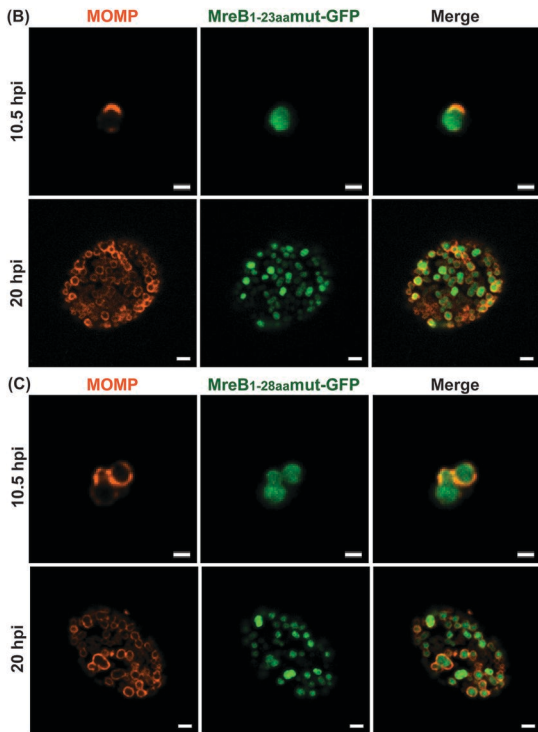

Figure 5



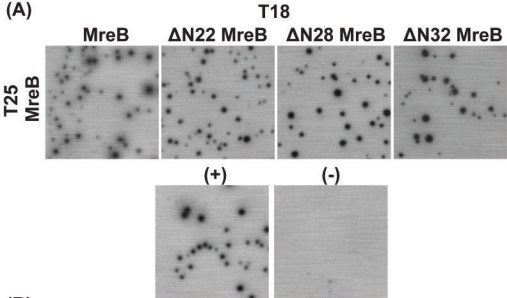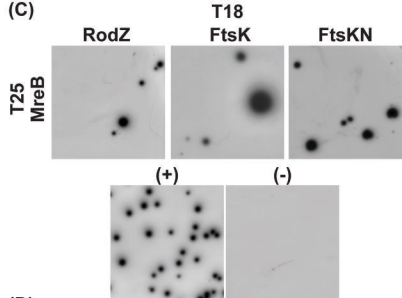

(B)

| T25<br>T18           | MreB | $\Delta$ N22<br>MreB | $\Delta$ N28<br>MreB | $\Delta$ N32<br>MreB |
|----------------------|------|----------------------|----------------------|----------------------|
| MreB                 | +    | +                    | +                    | +                    |
| $\Delta$ N22<br>MreB | +    | +                    | /                    | /                    |
| $\Delta$ N28<br>MreB | +    | /                    | +                    | /                    |
| $\Delta$ N32<br>MreB | +    | /                    | /                    | +                    |

(D)

| T18<br>T25           | RodZ | FtsK | FtsKN |
|----------------------|------|------|-------|
| MreB                 | +    | +    | +     |
| $\Delta$ N22<br>MreB | -    | -    | -     |
| $\Delta$ N28<br>MreB | -    | -    | -     |
| $\Delta$ N32<br>MreB | -    | -    | -     |

Figure 6
